# Supplementary material for: Interdependencies of Gene Expression and Function between Two Redox Enzymes and REG Family Proteins in Murine Pancreatic Islets and Human Pancreatic Cells
Source: MDPI journal article supplement (doi:10.3390/antiox12040849), 2023-04-01
Supplement: s1 [file s1]

**Supplemental Table S1. Primers used for Q-PCR analysis**

| Gene Name                       | Accession number | Product size | Primer (5'-3')                                                       |
|---------------------------------|------------------|--------------|----------------------------------------------------------------------|
| Murine genes                    |                  |              |                                                                      |
| <i><math>\beta</math>-actin</i> | NM_007393.5      | 156          | Forward TCATGAAGTGTGACGTTGACATC<br>Reverse CAGGAGGAGCAATGATCTTGATCT  |
| <i>Reg1</i>                     | NM_009042.2      | 111          | Forward GACTCCATGATCCCCAAAAGG<br>Reverse CACAGTAGCCACGATTGGAA        |
| <i>Reg2</i>                     | NM_009043.2      | 107          | Forward TCCCCTTGGCTGAAAAAGAC<br>Reverse CCAGGTCAAACGGTCTTCAA         |
| <i>Reg3<math>\alpha</math></i>  | NM_011259.1      | 107          | Forward AGGCTTCCTTTGTGTCCTCCTT<br>Reverse TCCACCTCCATTGGGTTGTTGA     |
| <i>Reg3<math>\beta</math></i>   | NM_011036.1      | 175          | Forward AAGACAGACAAGATGCTGCCTCCA<br>Reverse ACAAGGCATAGCAGTAGGAGCCAT |
| <i>Reg3<math>\gamma</math></i>  | NM_011260.2      | 149          | Forward TCCTTTCTCAGGTGCAAGGTGA<br>Reverse TTGGCAGGCCATATCTGCATCA     |
| <i>Reg3<math>\delta</math></i>  | NM_013893.2      | 173          | Forward AGCATGTCCTGGATGCTACTGTGT<br>Reverse ATCTCTGCATTAGCCCAGGTCTGT |
| <i>Reg4</i>                     | NM_026328.2      | 123          | Forward ATCAGAGAAACCTGCCTGTGTGGA<br>Reverse TGGCTTCACTCTTTGTCCTGGGAT |
| Human genes                     |                  |              |                                                                      |
| <i><math>\beta</math>-ACTIN</i> | NM_001101.5      | 184          | Forward AGAGCTACGAGCTGCCTGAC<br>Reverse AGCACTGTGTTGGCGTACAG         |
| <i>REG1A</i>                    | NM_002909.5      | 195          | Forward CCTTTGTGGCCTCACTGATT<br>Reverse GGAATCCTGTGCTTGAGGTC         |
| <i>REG1B</i>                    | NM_006507.4      | 164          | Forward CCAACTCGTTCTTCATGCTG<br>Reverse AACCCAGGTCTCAGGGTCTT         |
| <i>REG3A</i>                    | NM_138937.3      | 93           | Forward AGAGAATATTCGCTTAATTCC<br>Reverse AATGAAGAGACTGAAATGACA       |
| <i>REG3G</i>                    | NM_001008387.3   | 90           | Forward GAATATTCTCCCCAAACTG<br>Reverse GAGAAAAGCCTGAAATGAAG          |
| <i>REG4</i>                     | NM_001159352.2   | 86           | Forward ATCCTGGTCTGGCAAGTC<br>Reverse CGTTGCTGCTCCAAGTTA             |

Abbreviation: Reg/REG: regenerating islet-derived protein.
